# Supplementary material for: The influence of Al3+ on DNA methylation and sequence changes in the triticale (× Triticosecale Wittmack) genome
Source: PubMed Central journal article supplement (PMC7902597; doi:10.1007/s13353-018-0459-0), 2018-08-30

**A) HM-TCG/E-AGA**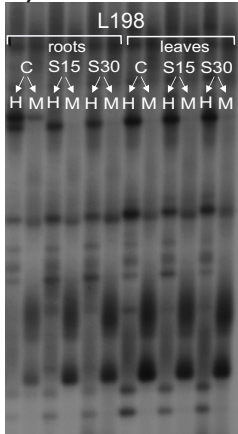**B) HM-TGA/E-AGG**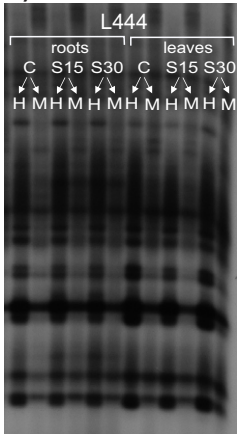**D) HM-TGC/E-ACA**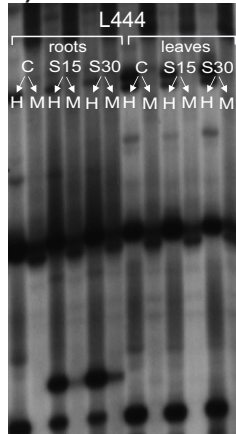**C) HM-TCAA/E-ACC**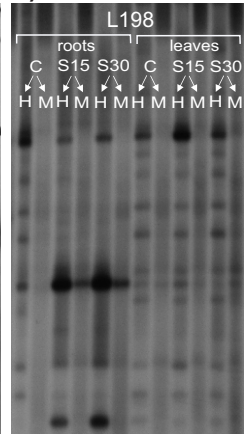

Supplement: 13353_2018_459_MOESM3_ESM.pdf [file 13353_2018_459_MOESM3_ESM.pdf]
